# Supplementary material
Source: publisher figshare collection journal article supplement (https://karger.figshare.com/ndownloader/files/23423168)
Supplement: Supplementary file 1 [file 23423168]

**Supplementary Table 1.** Demographic and clinical factors evaluated in univariate analysis

| *Baseline demographic and clinical factors:*   - Sex - Age group - Race - Ethnicity - Geographic region - Height at baseline - Weight at baseline - BMI at baseline - Primary reason for ESRD - Type of dialysis (HD or PD) - Time from first dialysis - Dialysis adequacy   *Phosphate binder treatment-related factors:*   - Treatment (sucroferric oxyhydroxide or sevelamer) - Maximum phosphate binder dose received - Average daily number of PB tablets taken - Average daily PB dose   *Concomitant medications:*   - Concomitant active vitamin D use (yes/no) - Concomitant cinacalcet use (yes/no)   *Baseline serum levels of the following laboratory parameters:*   - Phosphorus - FGF-23 - Intact PTH - Corrected calcium - Ionized calcium - Total calcium - Bone specific alkaline phosphatase - Carboxyterminal cross-linking telopeptide - Osteocalcin - Tartrate-resistant acid phosphatase 5b - 25-hydroxyvitamin D - 1,25-hydroxyvitamin D |
| --- |

ESRD, end-stage renal disease; FGF-23, fibroblast growth factor-23; HD, hemodialysis; iPTH, intact parathyroid hormone; PD, peritoneal dialysis
